# Supplementary material for: Exploring the Potential of Water-Soluble Cu(II) Complexes with MPA–CdTe Quantum Dots for Photoinduced Electron Transfer
Source: MDPI journal article supplement (doi:10.3390/catal12040422), 2022-04-09
Supplement: s1 [file s1]

# **Exploring the Potential of Water Soluble Cu(II) Complexes with MPA-CdTe Quantum Dots for Photoinduced Electron Transfer**

Niharika Krishna Botcha<sup>1</sup>, Rithvik R. Gutha<sup>2</sup>, Seyed M. Sadeghi<sup>2</sup>, Anusree Mukherjee<sup>3\*</sup>

<sup>1</sup>Department of Chemistry, The University of Alabama in Huntsville, 301 Sparkman Drive, Huntsville, AL 35899, USA

<sup>2</sup>Department of Physics and Astronomy, The University of Alabama in Huntsville, 301 Sparkman Drive, Huntsville, AL 35899, USA

<sup>3</sup>Department of Chemistry and Geosciences, Jacksonville State University, 700 Pelham Rd N, Jacksonville, AL 36265, USA

\*Correspondence: amukherjee@jsu.edu

## **Ligand Synthesis**

The ligands for complexes **1-3** (BPMEN, 345BPMEN and PDP respectively) were synthesized following the procedures listed in literature.<sup>1,2</sup>

Caution! Although no problems occurred in this work, perchlorate salts mixed with organic compounds can be explosive. All necessary safety precautions should be followed.

## **Synthesis of [CuBPMEN](ClO<sub>4</sub>)<sub>2</sub> (**1**)**

The complex **1** was prepared by following a similar procedure as reported in literature.<sup>1-4</sup> The ligand BPMEN (0.271 g, 1 mmol) dissolved in methanol (4 mL) was added dropwise to a stirring solution of Cu(ClO<sub>4</sub>)<sub>2</sub>•6H<sub>2</sub>O (0.371 g, 1 mmol) in methanol (4 mL). A dark blue solution was obtained upon addition. Evaporation of the solvent gave a dark blue colored powder (0.525 g, Yield: 98 %).

ESI-MS (in CH<sub>3</sub>OH) for [(CuBPMEN)ClO<sub>4</sub>]<sup>+</sup> (z = 1) m/z 432.12 (experimental) m/z 432.10 (theoretical) and for [(CuBPMEN)]<sup>2+</sup> (z = 2) m/z 166.59 (experimental) m/z 166.56 (theoretical). Elemental analysis Calculated (%): C 36.07, H 4.16, N 10.52 Found (%): C 36.89, H 4.92, N 9.62. UV-Vis (λ<sub>max</sub> (nm)) [ε (M<sup>-1</sup> cm<sup>-1</sup>)] in H<sub>2</sub>O at 25 °C: 631 (140).

### Synthesis of [Cu345BPMEN](ClO<sub>4</sub>)<sub>2</sub> (**2**)

The complex **2** was prepared by following similar procedure as reported for **1**. The ligand 345BPMEN (0.102 g, 0.512 mmol) dissolved in methanol (4 mL) was added dropwise to a stirring solution of Cu(ClO<sub>4</sub>)<sub>2</sub>•6H<sub>2</sub>O (0.190 g, 0.512 mmol) in methanol (4 mL). A blue solution was obtained upon addition. Evaporation of the solvent gave a blue colored powder (0.590 g, Yield: 91 %).

ESI-MS (in CH<sub>3</sub>OH) for [(Cu345BPMEN)ClO<sub>4</sub>]<sup>+</sup> (z = 1) m/z 548.22 (experimental) m/z 548.31 (theoretical) and for [(Cu345BPMEN)]<sup>2+</sup> (z = 2) m/z 224.73 (experimental) m/z 224.85 (theoretical). Elemental analysis Calculated (%): C 38.53, H 5.90, N 7.81 Found (%): C 38.29, H 5.50, N 8.29. UV-Vis (λ<sub>max</sub> (nm)) [ε (M<sup>-1</sup> cm<sup>-1</sup>)] in H<sub>2</sub>O at 25 °C: 630 (128).

### Synthesis of [CuPDP](ClO<sub>4</sub>)<sub>2</sub> (**3**)

The complex **3** was prepared by following similar procedure as reported for **1**. The ligand PDP (0.150 g, 0.465 mmol) dissolved in methanol (3 mL) was added dropwise to a stirring solution of  $\text{Cu}(\text{ClO}_4)_2 \cdot 6\text{H}_2\text{O}$  (0.173 g, 0.465 mmol) in methanol (3 mL). A violet solution was obtained upon addition. Evaporation of the solvent gave a violet blue colored powder (0.254 g, Yield: 93 %).

ESI-MS (in  $\text{CH}_3\text{OH}$ ) for  $[(\text{CuPDP})\text{ClO}_4]^+$  ( $z = 1$ )  $m/z$  484.16 (experimental)  $m/z$  484.15 (theoretical) and for  $[(\text{CuPDP})]^{2+}$  ( $z = 2$ )  $m/z$  192.66 (experimental)  $m/z$  192.67 (theoretical).

Elemental analysis Calculated (%): C 39.84, H 4.68, N 9.37, Cl 11.70 Found (%): C 39.96, H 4.52, N 9.37, Cl 11.70. UV-Vis ( $\lambda_{\text{max}}$  (nm)) [ $\epsilon$  ( $\text{M}^{-1} \text{cm}^{-1}$ )] in  $\text{H}_2\text{O}$  at 25 °C: 593 (95).

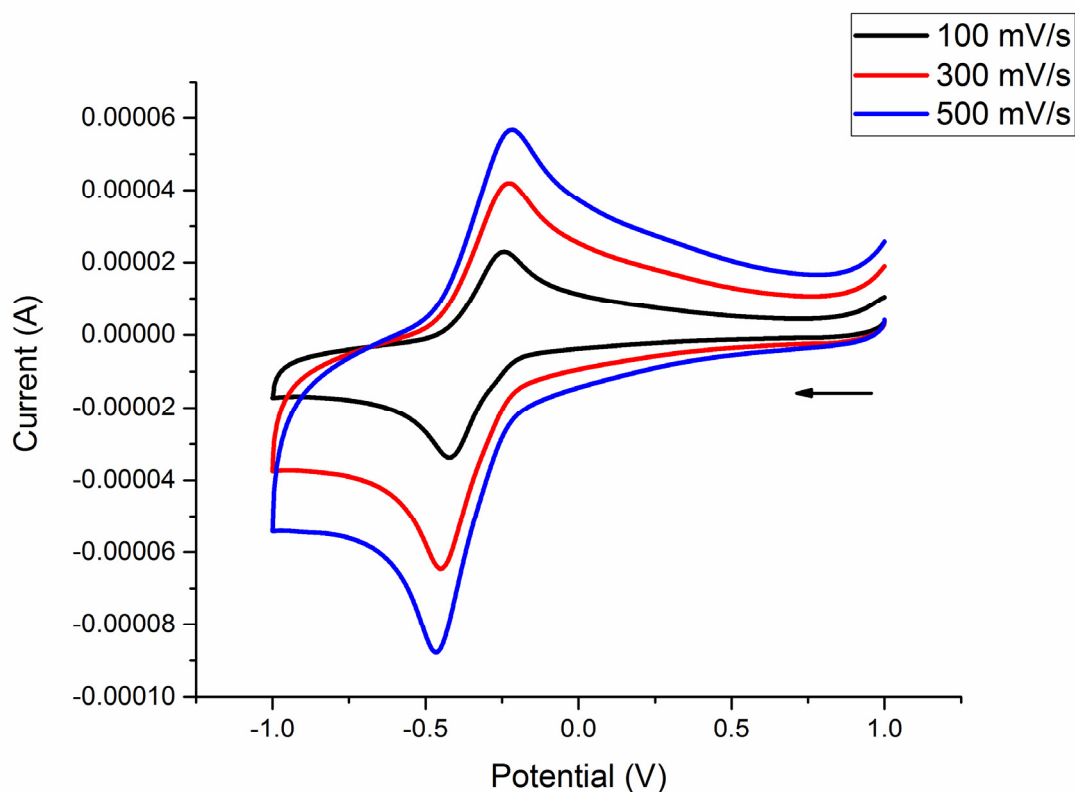

**Figure S1:** Cyclic Voltammogram of **1** in water under N<sub>2</sub> with Ag/AgCl as the reference electrode and 0.1 M KCl as the supporting electrolyte

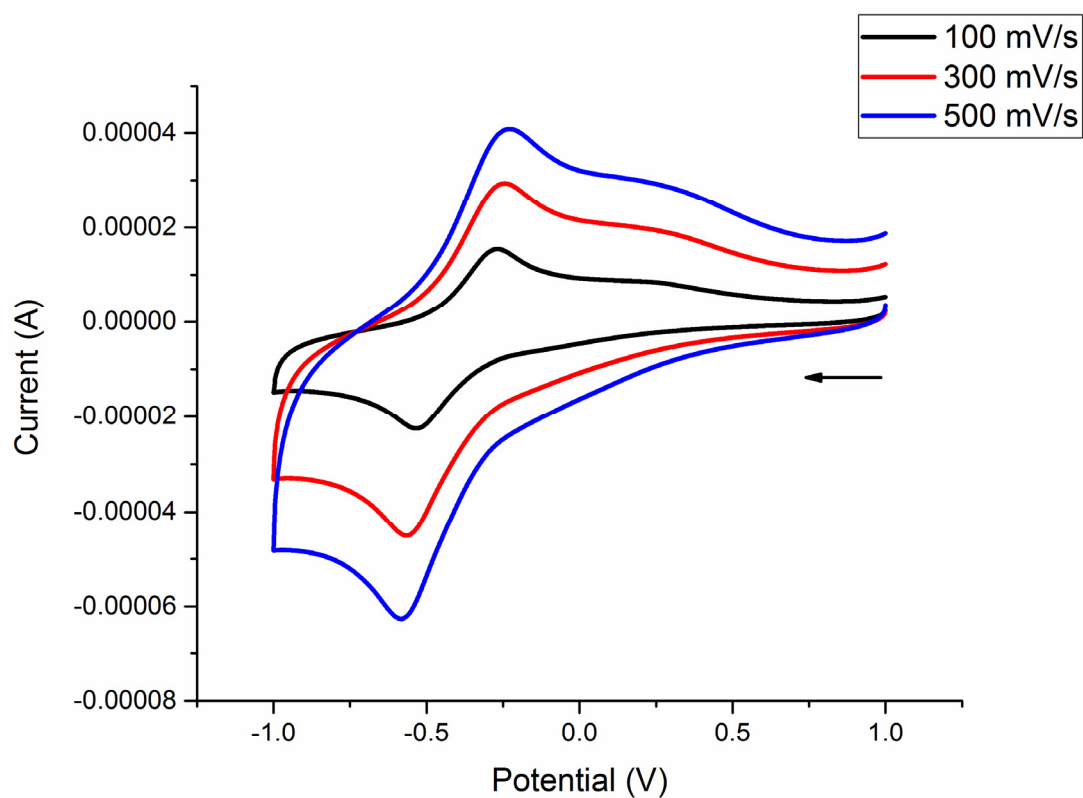

**Figure S2:** Cyclic Voltammogram of **2** in water under N<sub>2</sub> with Ag/AgCl as the reference electrode and 0.1 M KCl as the supporting electrolyte

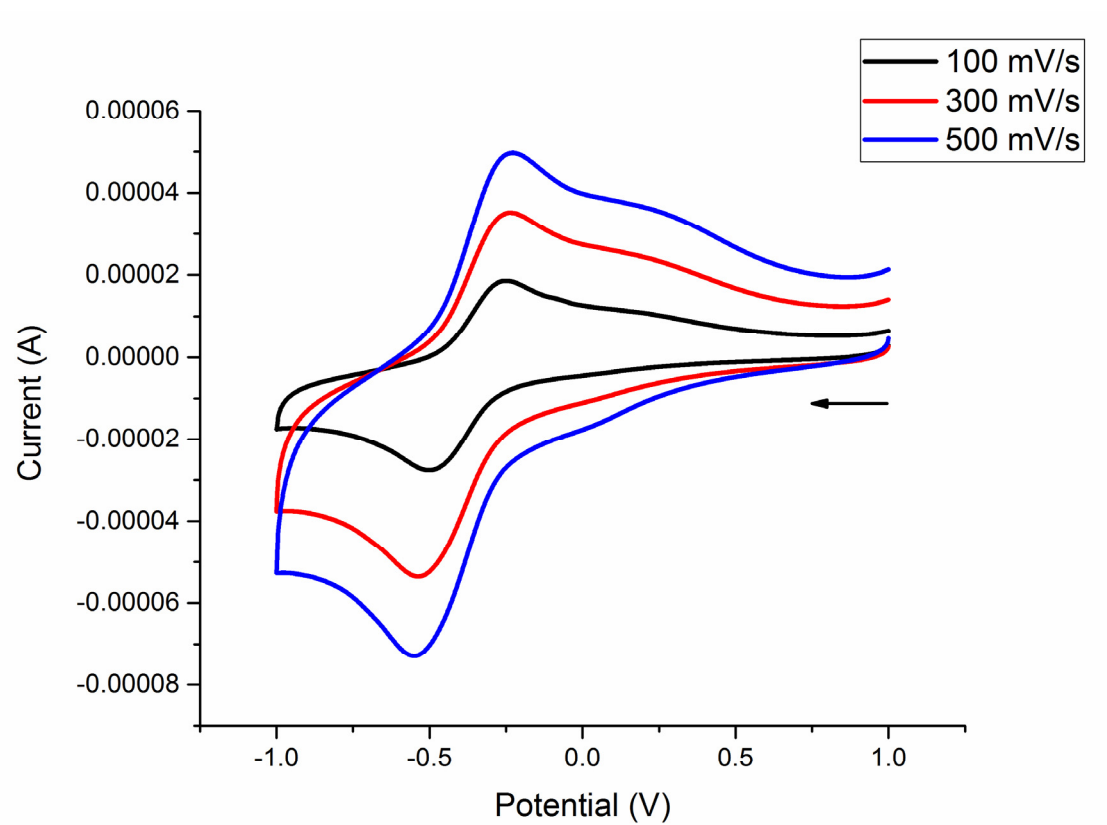

**Figure S3:** Cyclic Voltammogram of **3** in water under N<sub>2</sub> with Ag/AgCl as the reference electrode and 0.1 M KCl as the supporting electrolyte

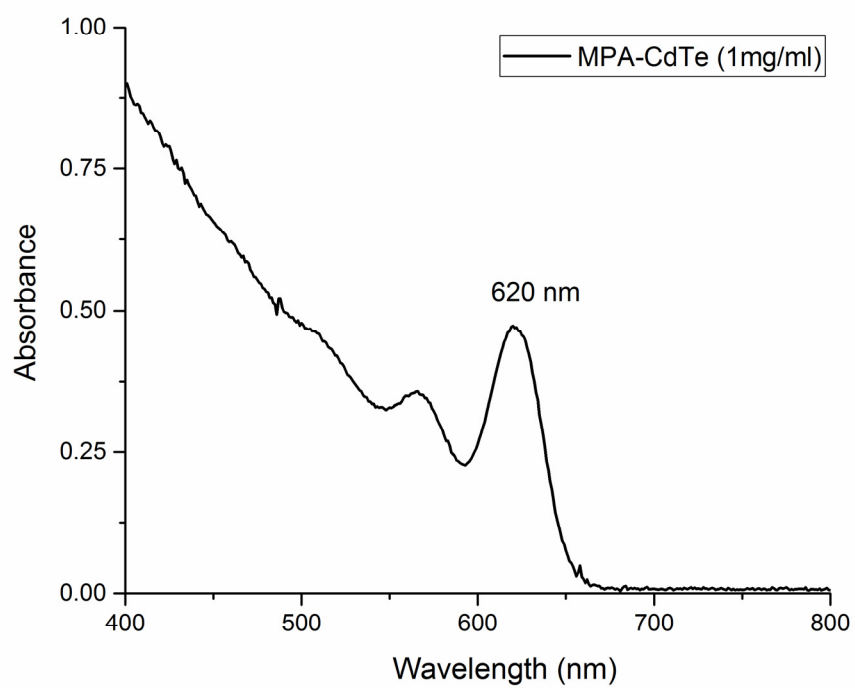

**Figure S4:** UV-Vis absorption spectra of MPA-CdTe QDs ( $2.8 \times 10^{-6}$  M, 1 mg/mL)

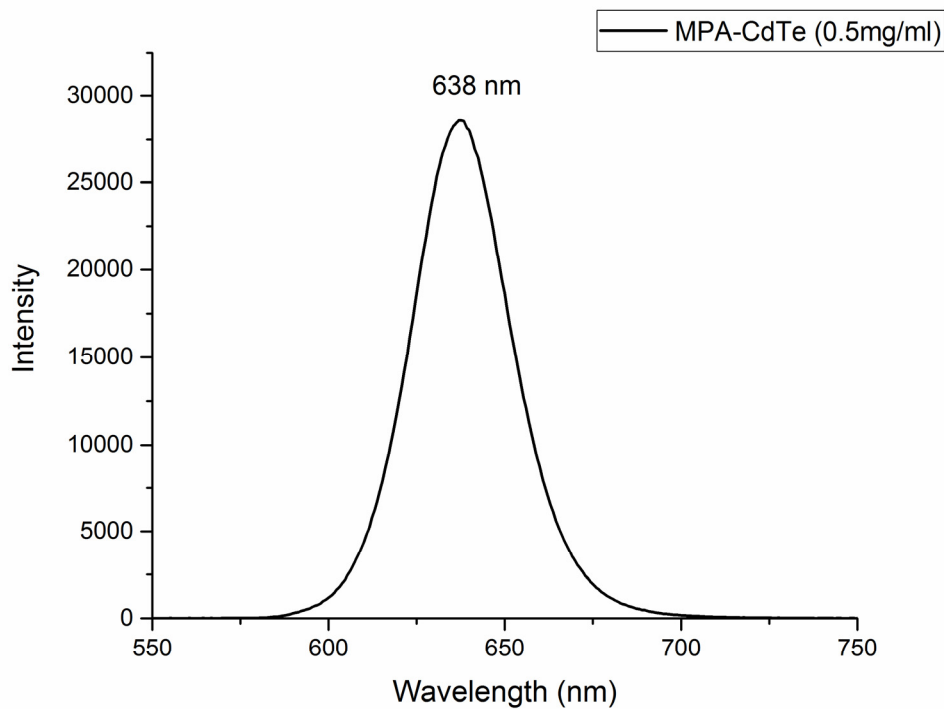

**Figure S5:** Emission spectra of MPA-CdTe QDs ( $1.4 \times 10^{-6}$  M, 0.5 mg/mL)

The concentration of the MPA-CdTe QDs was determined as  $2.8 \times 10^{-6}$  M (1 mg/mL) using the Beer–Lambert law (Figure S4). On the basis of the absorption band centered at 620 nm, the particle size of the MPA-CdTe QDs was determined to be 3.9 nm using the equations S1-S2.<sup>5</sup>

$$D = (9.8127 \times 10^{-7}) \lambda^3 - (1.7147 \times 10^{-3}) \lambda^2 + 1.0064 \lambda - 194.84 \quad (\text{S1})$$

$$\varepsilon = 10043(D)^{2.12} \quad (\text{S2})$$

wherein D (nm) is the diameter or size of a given nanocrystals sample,  $\lambda$  is the wavelength of the first absorption peak (from low energy) of the corresponding sample and  $\varepsilon$  is the extinction coefficient of the corresponding sample.

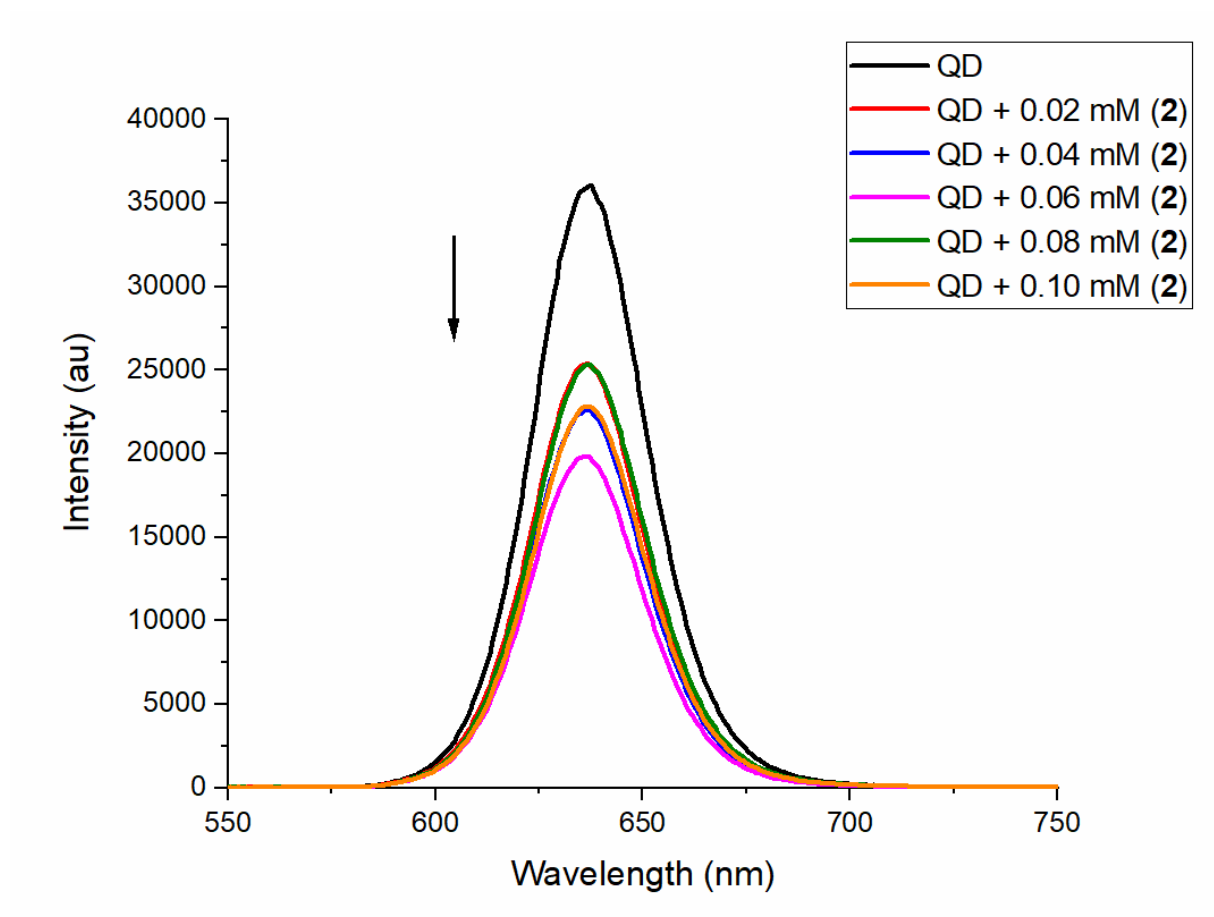

**Figure S6:** Emission spectra of MPA-CdTe quantum dots ( $1.4 \times 10^{-6}$  M, 0.5 mg/mL) with increasing concentration of **2** (0 to  $0.10 \times 10^{-3}$  M) in water (excitation wavelength: 514 nm)



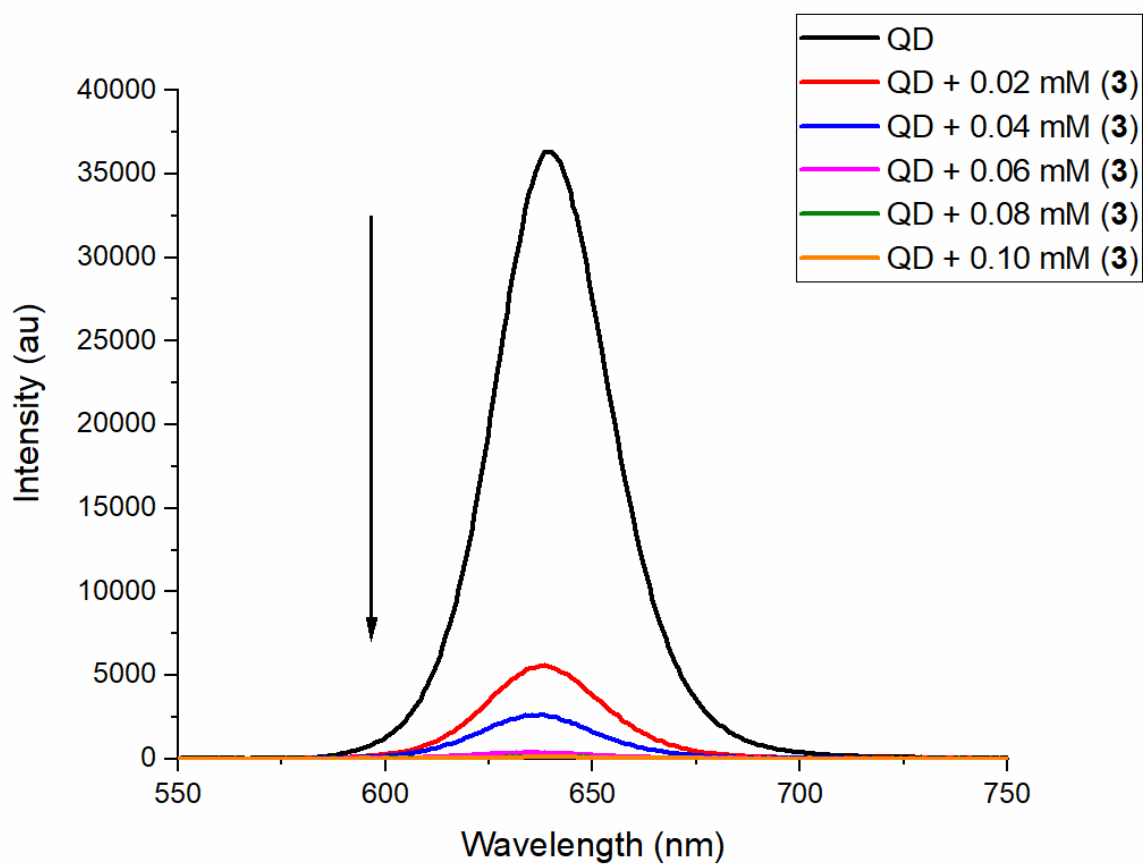

**Figure S7:** Emission spectra of MPA-CdTe quantum dots ( $1.4 \times 10^{-6}$  M, 0.5 mg/mL) with increasing concentration of **3** (0 to  $0.10 \times 10^{-3}$  M) in water (excitation wavelength: 514 nm)

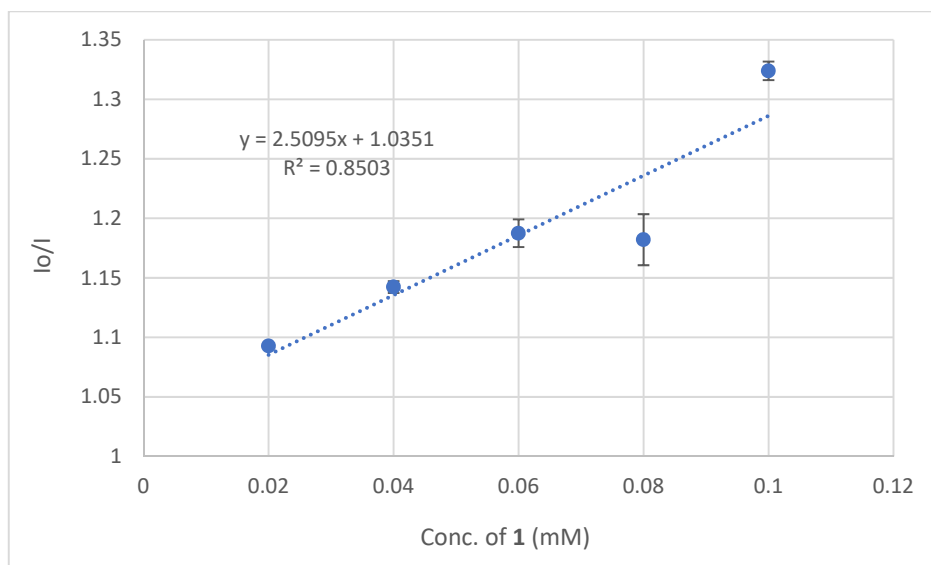

**Figure S8:** Stern-Volmer plot for the luminescence quenching of MPA-CdTe QDs with **1**

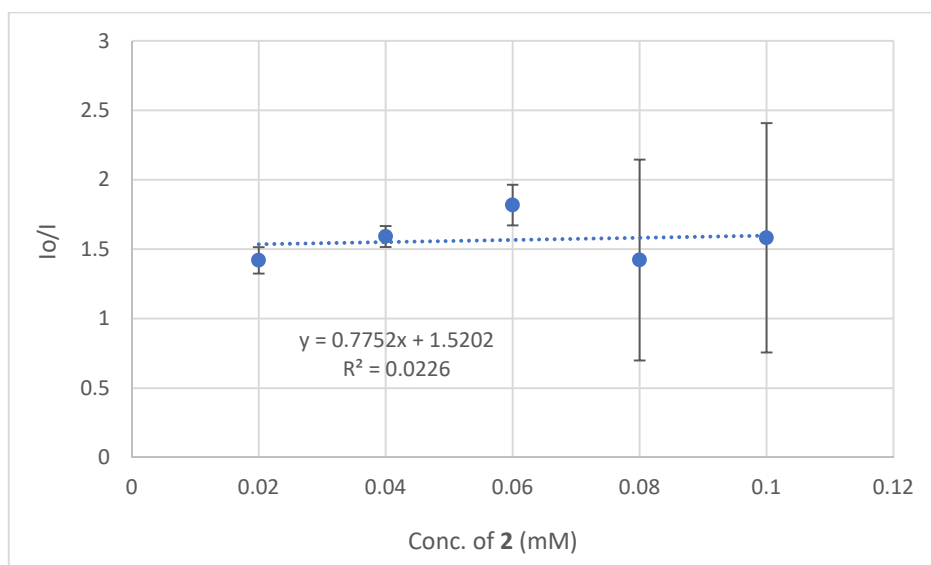

**Figure S9:** Stern-Volmer plot for the luminescence quenching of MPA-CdTe QDs with **2**

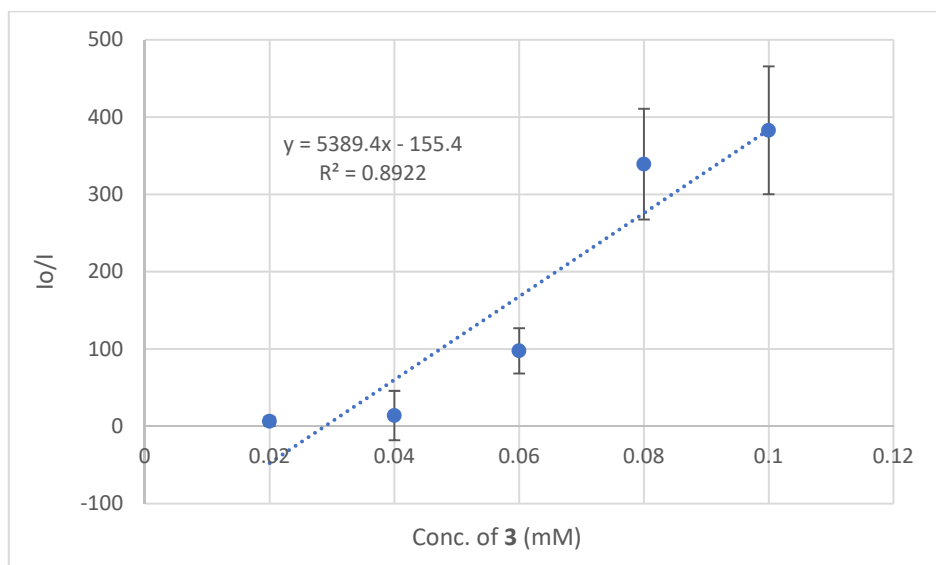

**Figure S10:** Stern-Volmer plot for the luminescence quenching of MPA-CdTe QDs with **3**

**Table S1:** The Stern–Volmer quenching constant  $K_{sv}$  for the complexes **1** and **3**

| Complex  | $K_{sv}$ ( $M^{-1}$ ) |
|----------|-----------------------|
| <b>1</b> | $3.0 \times 10^3$     |
| <b>3</b> | $3.3 \times 10^6$     |

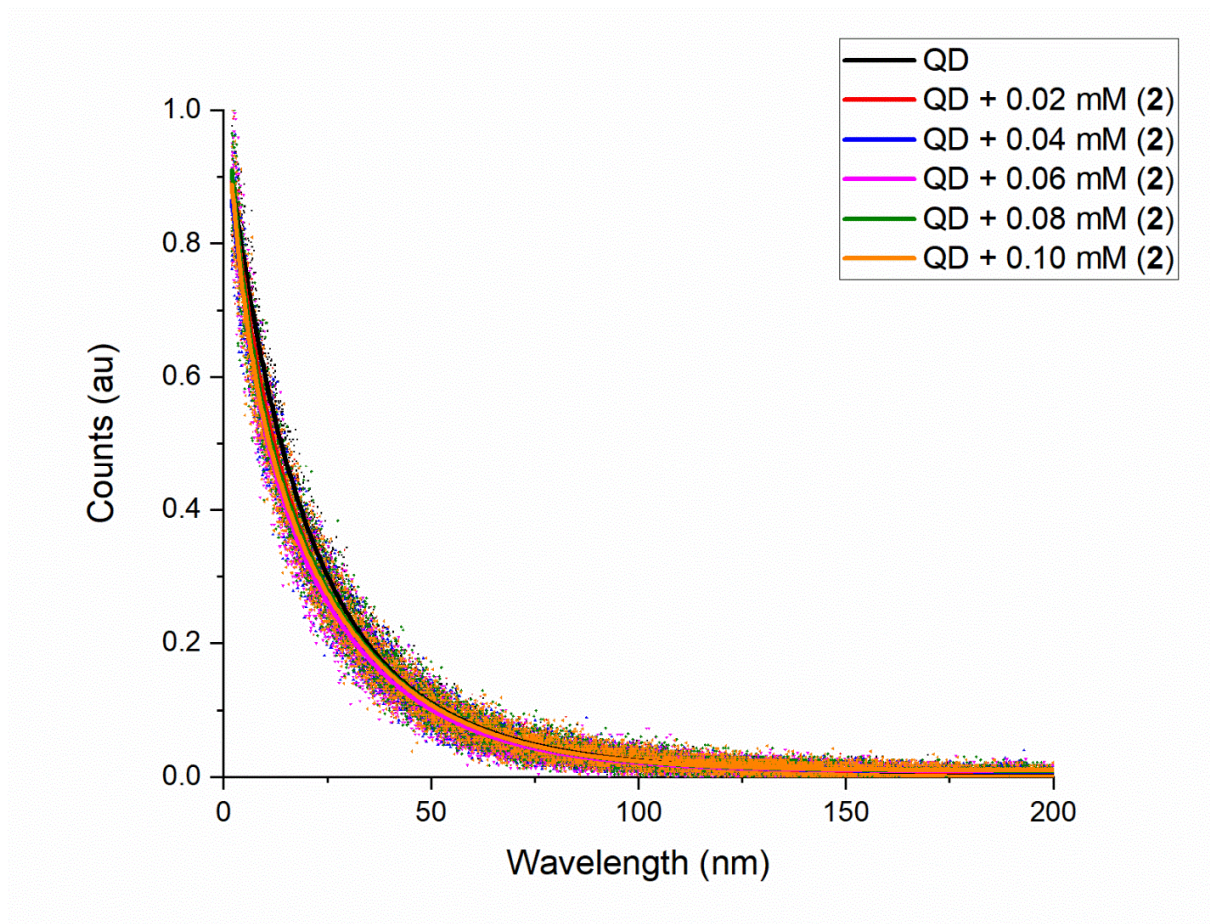

**Figure S11:** The lifetime of MPA-CdTe quantum dots ( $1.4 \times 10^{-6}$  M, 0.5 mg/mL) with increasing concentrations of **2** (0 to  $0.10 \times 10^{-3}$  M) in water (excitation wavelength: 450 nm).

The decay lifetime was best fit by a biexponential function (Equation S3).

$$A_1 \exp(-t/\tau_1) + A_2 \exp(-t/\tau_2) \quad (\text{S3})$$

Where,  $A_1$  and  $A_2$  are the amplitudes and  $\tau_1$  and  $\tau_2$  are the lifetimes.

**Table S2:** Mean lifetimes of the quantum dots in the presence of complexes **1-2**

|              | Mean Lifetime<br>for <b>1</b> (ns) | Mean Lifetime<br>for <b>2</b> (ns) |
|--------------|------------------------------------|------------------------------------|
| QD           | 25                                 | 25                                 |
| QD + 0.02 mM | 24                                 | 24                                 |
| QD + 0.04 mM | 24                                 | 24                                 |
| QD + 0.06 mM | 25                                 | 24                                 |
| QD + 0.08 mM | 24                                 | 24                                 |
| QD + 0.10 mM | 25                                 | 24                                 |

**Table S3:** Biexponential fit parameters and mean lifetimes for **1**

|                           | A <sub>1</sub> | $\tau_1$ (ns) | A <sub>2</sub> | $\tau_2$ (ns) | Average $\tau$ (ns) |
|---------------------------|----------------|---------------|----------------|---------------|---------------------|
| QD                        | 0.55           | 15.57         | 0.30           | 33.46         | 25.3                |
| QD + 0.02 mM ( <b>1</b> ) | 0.37           | 12.73         | 0.46           | 28.56         | 24.3                |
| QD + 0.04 mM ( <b>1</b> ) | 0.25           | 9.99          | 0.56           | 26.49         | 24.1                |
| QD + 0.06 mM ( <b>1</b> ) | 0.37           | 11.69         | 0.50           | 28.47         | 24.5                |
| QD + 0.08 mM ( <b>1</b> ) | 0.21           | 7.83          | 0.63           | 25.60         | 23.9                |
| QD + 0.10 mM ( <b>1</b> ) | 0.28           | 9.18          | 0.55           | 27.28         | 24.6                |

**Table S4:** Biexponential fit parameters and mean lifetimes for **2**

|                           | A <sub>1</sub> | $\tau_1$ (ns) | A <sub>2</sub> | $\tau_2$ (ns) | Average $\tau$ (ns) |
|---------------------------|----------------|---------------|----------------|---------------|---------------------|
| QD                        | 0.51           | 15.01         | 0.38           | 31.72         | 25.2                |
| QD + 0.02 mM ( <b>2</b> ) | 0.21           | 7.03          | 0.63           | 25.46         | 23.8                |
| QD + 0.04 mM ( <b>2</b> ) | 0.18           | 6.08          | 0.62           | 25.11         | 23.8                |
| QD + 0.06 mM ( <b>2</b> ) | 0.27           | 5.07          | 0.62           | 25.11         | 23.5                |
| QD + 0.08 mM ( <b>2</b> ) | 0.18           | 4.61          | 0.65           | 25.10         | 24.1                |
| QD + 0.10 mM ( <b>2</b> ) | 0.24           | 4.80          | 0.65           | 25.44         | 24.1                |

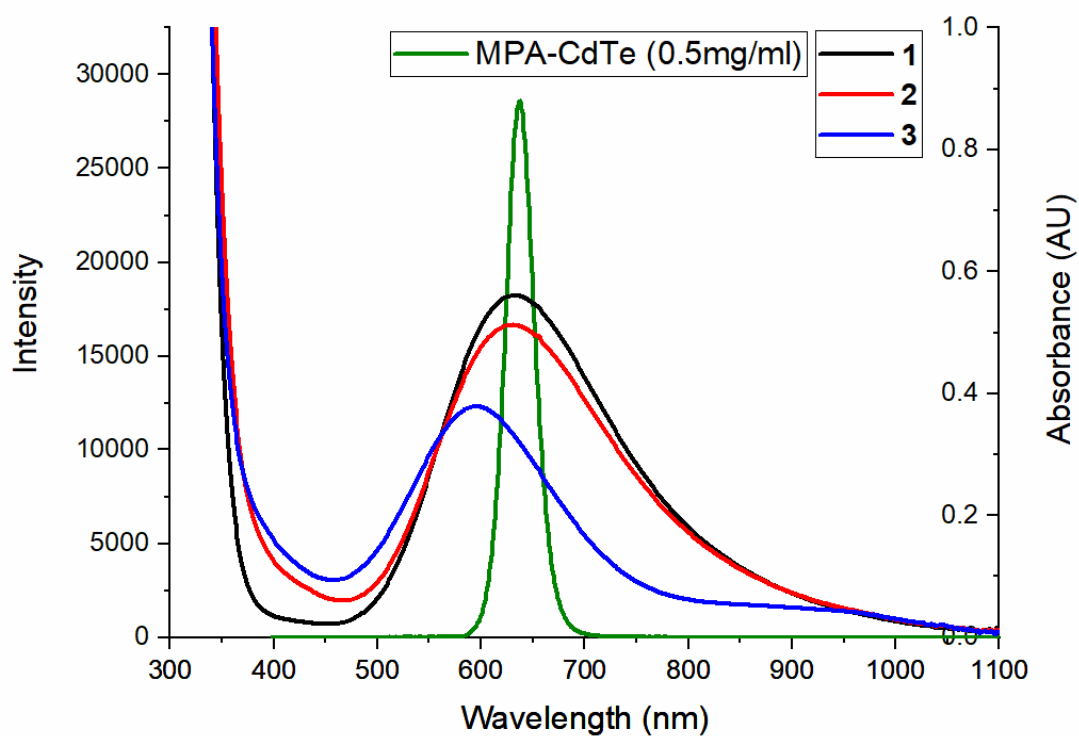**Figure S12:** Overlay of the absorption maxima of the complexes **1-3** (scale on right) and the emission maximum of the MPA-CdTe QDs (scale on left).

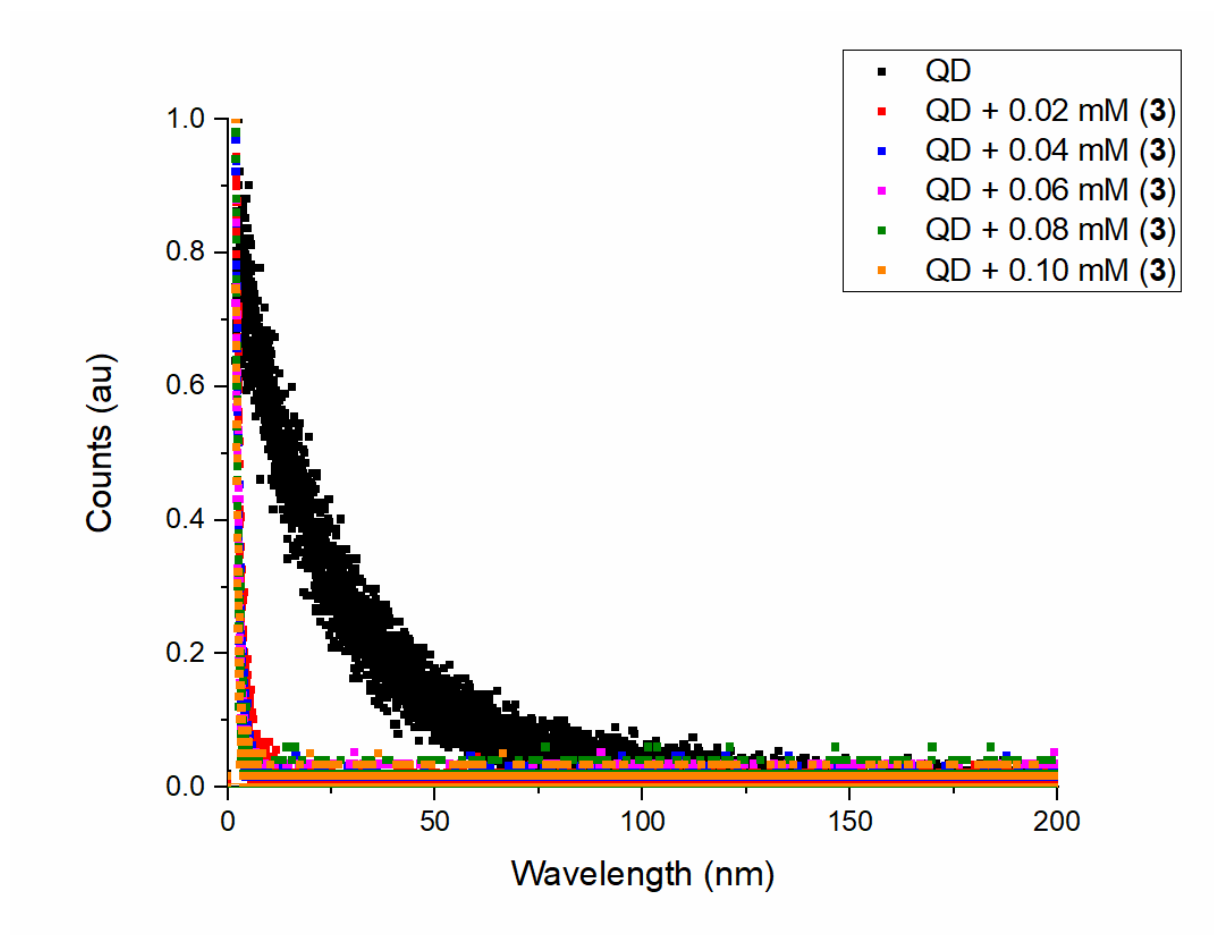

**Figure S13:** The lifetime of MPA-CdTe quantum dots ( $1.4 \times 10^{-6}$  M, 0.5 mg/mL) with increasing concentrations of **3** (0 to  $0.10 \times 10^{-3}$  M) in water (excitation wavelength: 450 nm)

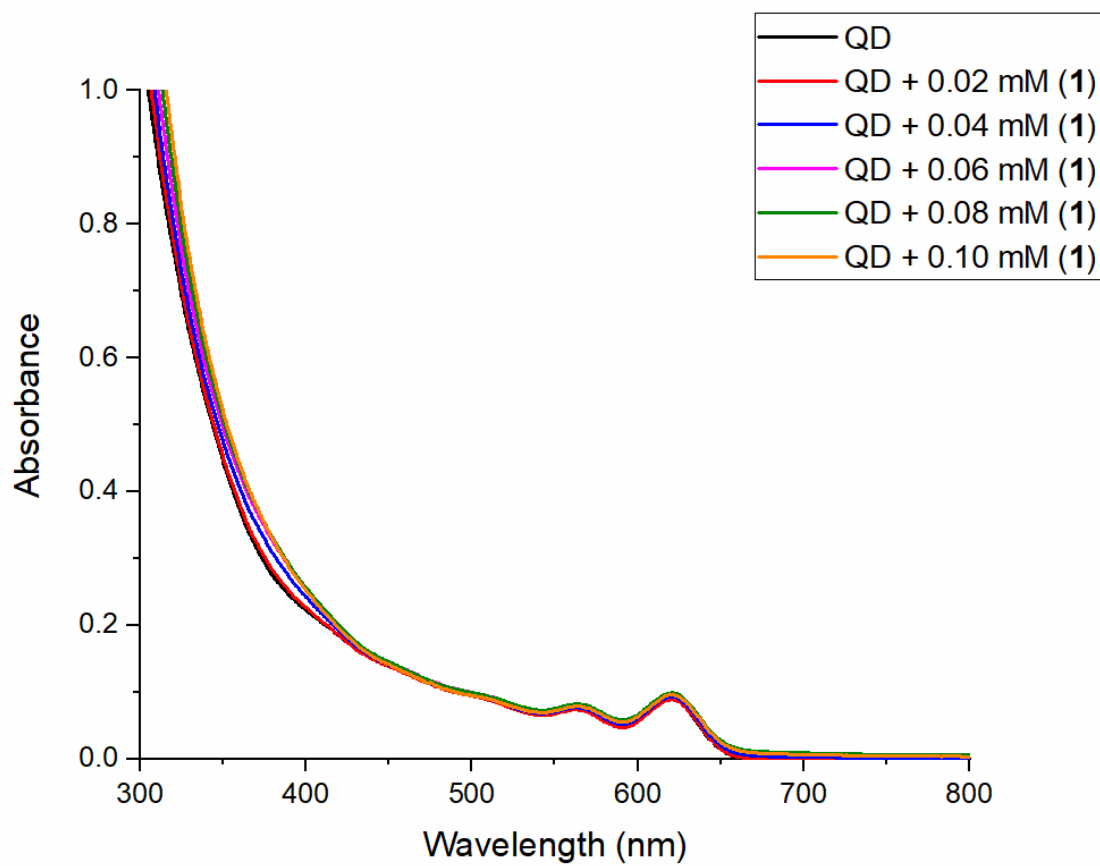

**Figure S14:** UV-Vis absorption spectra of MPA-CdTe quantum dots ( $1.4 \times 10^{-6}$  M, 0.5 mg/mL) with increasing concentration of **1** (0 to  $0.10 \times 10^{-3}$  M) in water



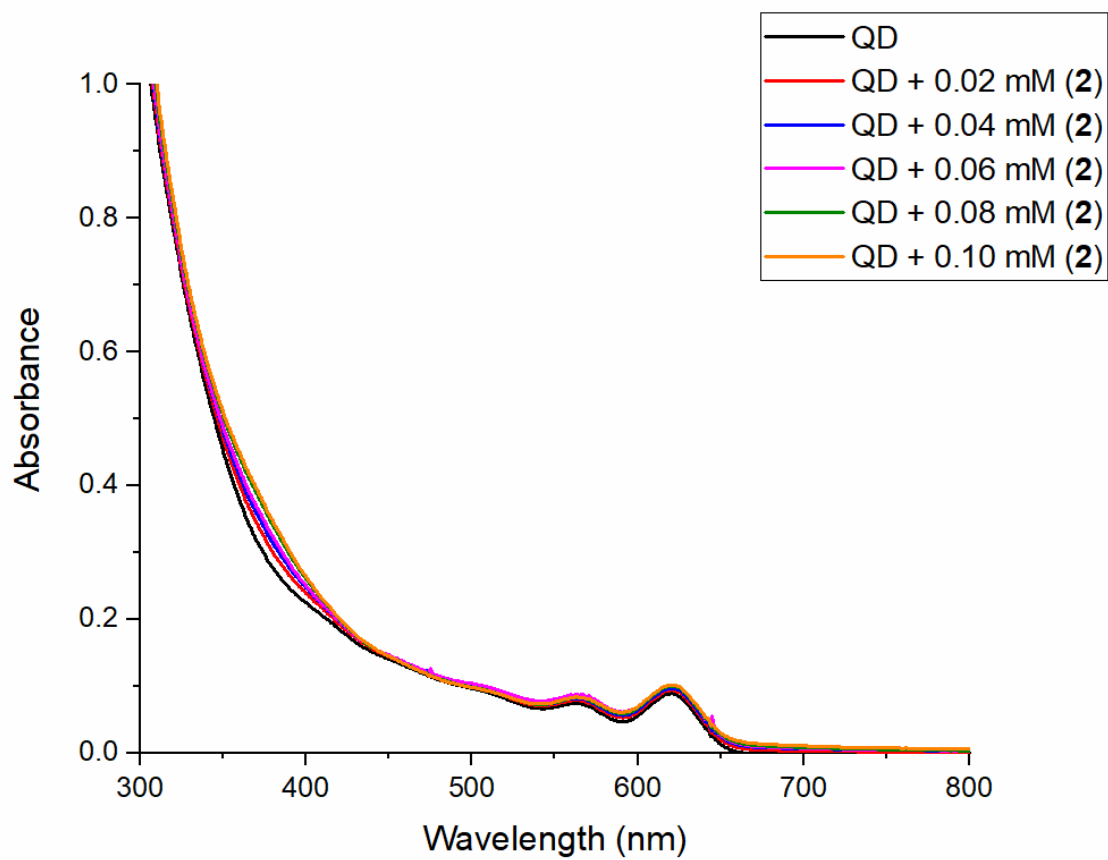

**Figure S15:** UV-Vis absorption spectra of MPA-CdTe quantum dots ( $1.4 \times 10^{-6}$  M, 0.5 mg/mL) with increasing concentration of **2** (0 to  $0.10 \times 10^{-3}$  M) in water

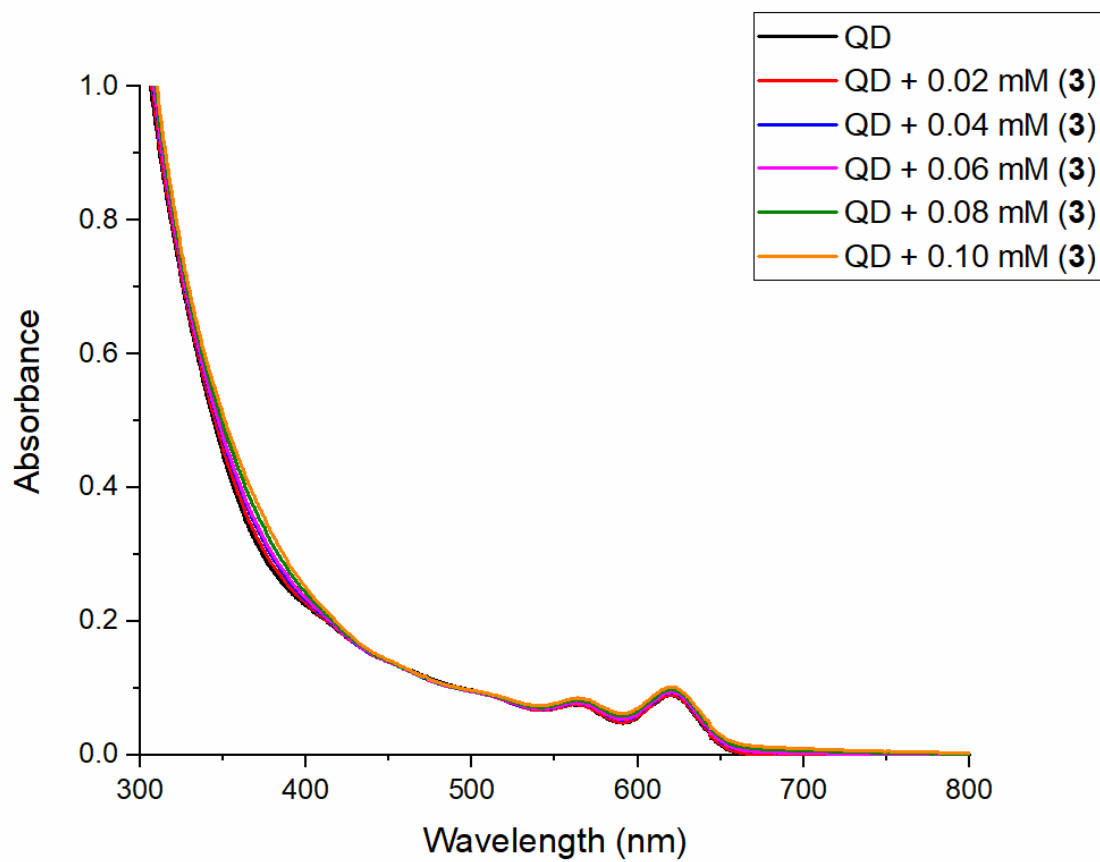

**Figure S16:** UV-Vis absorption spectra of MPA-CdTe quantum dots ( $1.4 \times 10^{-6}$  M, 0.5 mg/mL) with increasing concentration of **3** (0 to  $0.10 \times 10^{-3}$  M) in water

**Table S5:** Hydrodynamic sizes for QDs and complexes **1-3** from DLS measurements

| Complex  | QD + 0.10 mM<br>(Complex)<br>nm | QD + 0.20 mM<br>(Complex)<br>nm | QD + 0.30 mM<br>(Complex)<br>nm | QD + 0.40 mM<br>(Complex)<br>nm |
|----------|---------------------------------|---------------------------------|---------------------------------|---------------------------------|
| <b>1</b> | N/R                             | 129.2                           | 351.9                           | 2585                            |
|          |                                 | 142                             | 893.1                           | 3071                            |
|          |                                 | 221.3                           | 1222                            | 3679                            |
| <b>2</b> | N/R                             | N/R                             | 464.9                           | 463.8                           |
|          |                                 |                                 | 406.1                           | 374                             |
|          |                                 |                                 | 549.2                           | 541.4                           |
| <b>3</b> | N/R                             | N/R                             | 201.1                           | 672.2                           |
|          |                                 |                                 | 525.5                           | 421.5                           |
|          |                                 |                                 | 410                             | 382.4                           |

*N/R: No measurement could be recorded*

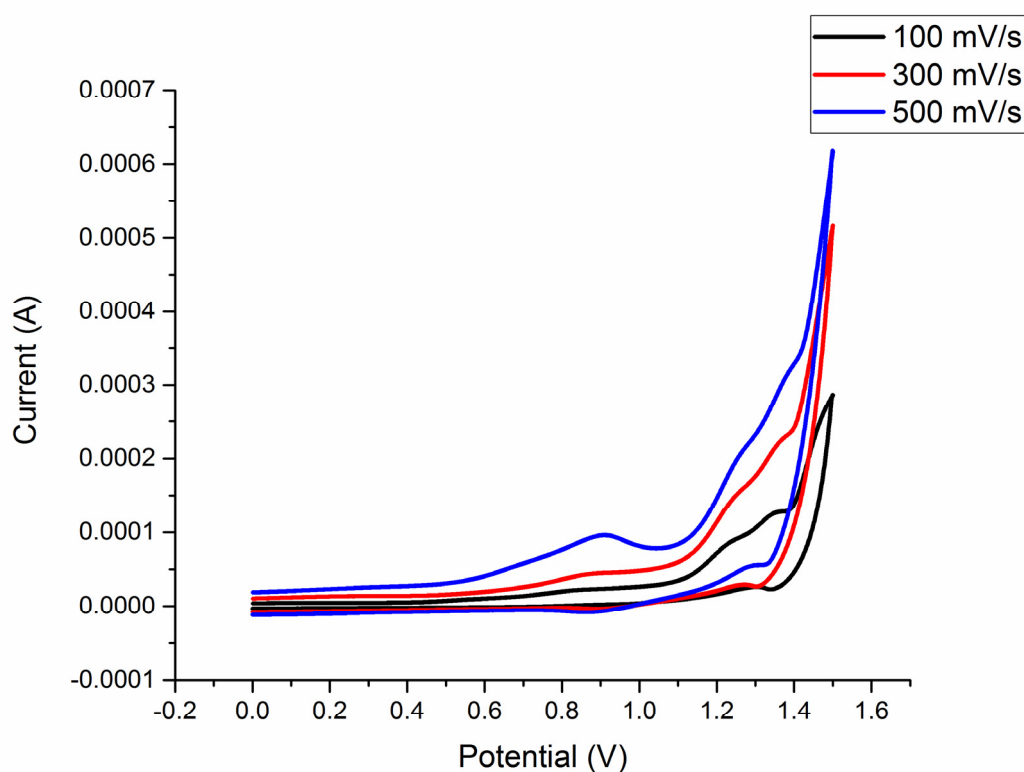

**Figure S17:** Cyclic Voltammogram of MPA-CdTe QDs in water under N<sub>2</sub> with Ag/AgCl as the reference electrode and 0.1 M KCl as the supporting electrolyte

The bandgap ( $E_g$ ) calculated from the absorption spectra of the MPA-CdTe QDs is 2 eV (Figure S4). The anodic peak potential of the MPA-CdTe QDs (Figure S14) is +0.907 V vs Ag/AgCl, which gives an estimated value for the valence band energy level ( $E_{vb}$ ) as +1.2 V vs NHE. Utilizing the values for  $E_{vb}$  and  $E_g$ , the calculated value for the conduction band energy level ( $E_{cb}$ ) for the MPA-CdTe QDs is -0.8 V vs NHE.

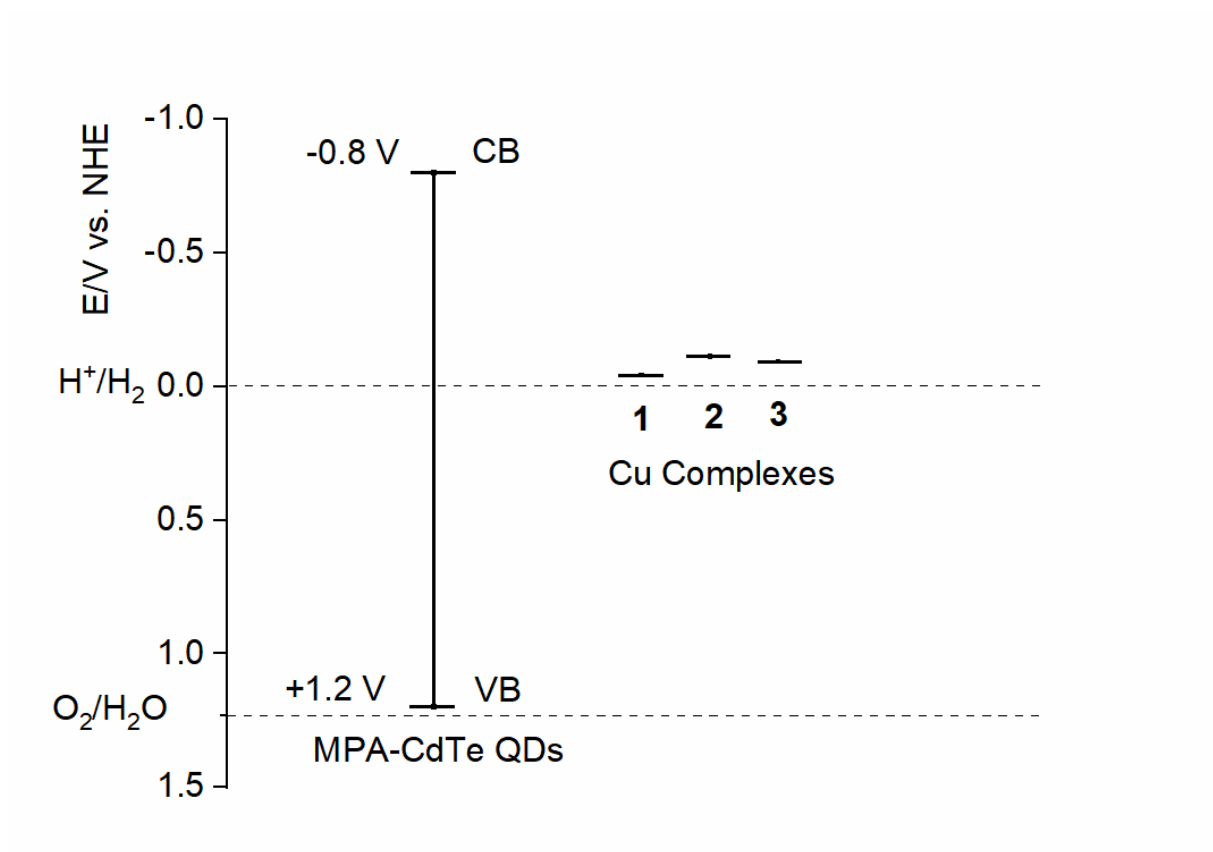

**Figure S18:** Bandgap (vs. NHE) of the MPA-CdTe quantum dots and the reduction potentials (vs. NHE) of the complexes **1–3**

## References

- (1) Botcha, N. K. Chemical Oxidation and Photoinduced Electron Transfer by Nickel and Copper Complexes : A Dissertation, The University of Alabama in Huntsville, Huntsville, 2021.
- (2) Botcha, N. K.; Gutha, R. R.; Sadeghi, S. M.; Mukherjee, A. Synthesis of Water-Soluble Ni(II) Complexes and Their Role in Photo-Induced Electron Transfer with MPA-CdTe Quantum Dots. *Photosynth Res* **2019**. <https://doi.org/10.1007/s11120-019-00668-z>.
- (3) Khazanov, T. M.; Botcha, N. K.; Yergeshbayeva, S.; Shatruk, M.; Mukherjee, A. Investigating Reactivity and Electronic Structure of Copper(II)-Polypyridyl Complexes

- and Hydrogen Peroxide. *Inorganica Chimica Acta* **2021**, *516*, 120168.  
<https://doi.org/10.1016/j.ica.2020.120168>.
- (4) Singh, N.; Botcha, N. K.; Jones, T. M.; Ertem, M. Z.; Niklas, J.; Farquhar, E. R.; Poluektov, O. G.; Mukherjee, A. Reactivity of Bio-Inspired Cu(II) (N<sub>2</sub>/Py<sub>2</sub>) Complexes with Peroxide at Room Temperature. *Journal of Inorganic Biochemistry* **2019**, *197*, 110674.  
<https://doi.org/10.1016/j.jinorgbio.2019.03.014>.
- (5) Yu, W. W.; Qu, L.; Guo, W.; Peng, X. Experimental Determination of the Extinction Coefficient of CdTe, CdSe, and CdS Nanocrystals. *Chem. Mater.* **2003**, *15* (14), 2854–2860. <https://doi.org/10.1021/cm034081k>.
